# Supplementary material for: Increased Glucose Transport into Neurons Rescues Aβ Toxicity in Drosophila
Source: PubMed Central journal article supplement (PMC5026704; doi:10.1016/j.cub.2016.07.017), 2016-09-12
Supplement: mmc1.pdf [file mmc1.pdf]

**Current Biology, Volume 26**

**Supplemental Information**

**Increased Glucose Transport into Neurons**

**Rescues A $\beta$  Toxicity in *Drosophila***

**Teresa Niccoli, Melissa Cabecinha, Anna Tillmann, Fiona Kerr, Chi T. Wong, Dalia Cardenes, Alec J. Vincent, Lucia Bettedi, Li Li, Sebastian Grönke, Jacqueline Dols, and Linda Partridge**

## Supplemental Figures

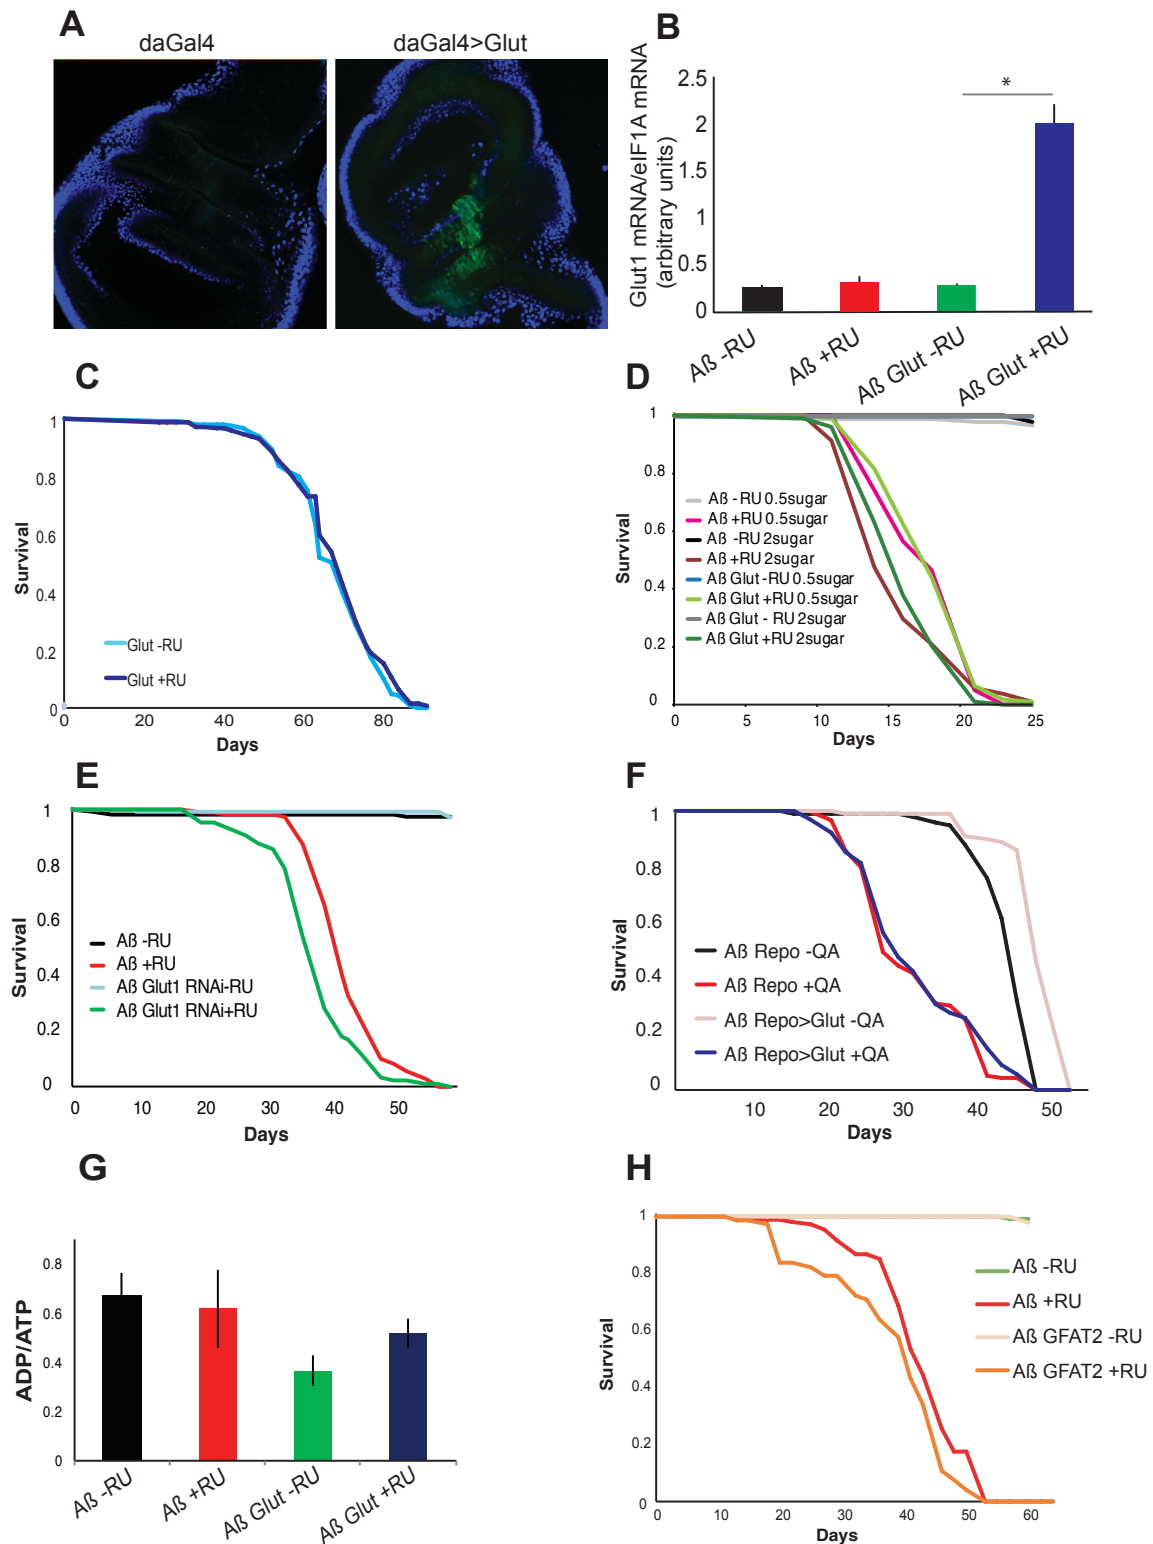

**Supplemental Figure 1, related to Fig 1. A.** Uptake of the fluorescent glucose analogue 2-NBDG (green) in imaginal discs expressing Glut1 and driver alone control (nuclei marked with DAPI in blue). **B.** Glut1 mRNA levels measured by qPCR (relative to eIF1A), showing increase in Glut1 levels in response to RU in the UAS-Glut1 line. Data are presented as means  $\pm$  SEM ( $n=3$ ) (\*  $p \leq 0.01$  by ANOVA) Genotypes: *UAS A $\beta$ ; elavGS*, *UAS A $\beta$  UAS Glut1; elavGS*. **C.** Survival curve of flies expressing Glut1 (+RU) and uninduced control (-RU) in adult neurons.

Genotype: *UAS-Glut1; elavGS*. **D.** Survival curve of flies expressing A $\beta$  or A $\beta$  Glut1 in adult neurons (+RU) and their uninduced control (-RU), at 29C, on different sucrose concentrations (2=10% and 0.5=2.5%). Sugar concentration differentially modifies the response to RU in A $\beta$  Glut1 flies relative to the A $\beta$  alone expressing flies ( $p < 0.05$  by Cox proportional hazards for the interaction between RU, Sugar and genotype). For the individual sugar concentrations comparison on +RU, the lifespans on 0.5x were not statistically significantly different, whereas for 2x sugar, the A $\beta$ Glut1 lifespan was statistically significantly longer than the A $\beta$  alone lifespan ( $p \leq 0.01$  by Cox proportional hazards analysis). **E.** Survival curves of A $\beta$  expressing flies in the presence and absence of Glut1. A $\beta$  Glut1RNAi is significantly shorter lived than the A $\beta$  alone ( $p < 0.001$  by log-rank for difference between A $\beta$  and A $\beta$  Glut1RNAi +RU). Genotypes: *wv; UAS A $\beta$ ; elavGS*, *wv; UAS A $\beta$ ; UAS Glut1RNAi/ elavGS*. **F.** Survival curves of flies expressing Glut1 in glia under the control of the repo promoter, while A $\beta$  was induced by feeding flies QA. Genotypes: *QUAS A $\beta$ ; repoGal4 nSybQF2 tubQS*, *QUAS A $\beta$ /UAS Glut1; repoGal4 nSybQF2 tubQS*. **G.** ADP/ATP ratio in day 19 fly heads expressing A $\beta$  or A $\beta$  Glut1. There is no statistical difference between the samples. Data are presented as means  $\pm$ SEM ( $n=4$ ). Genotypes: *UAS A $\beta$ ; elavGS*, *UAS A $\beta$ /UAS Glut1; elavGS*. **H.** GFAT2 expression shortens A $\beta$  lifespan. Survival curves of flies expressing A $\beta$  or A $\beta$  GFAT2 in neurons induced after eclosion (+RU) and uninduced controls (-RU). Genotypes: *UAS A $\beta$ / UAS GFAT2; elavGS*, *UAS A $\beta$ ; elavGS*. ( $p < 0.001$  for difference between A $\beta$  +RU and A $\beta$ GFAT2 +RU by log-rank test)

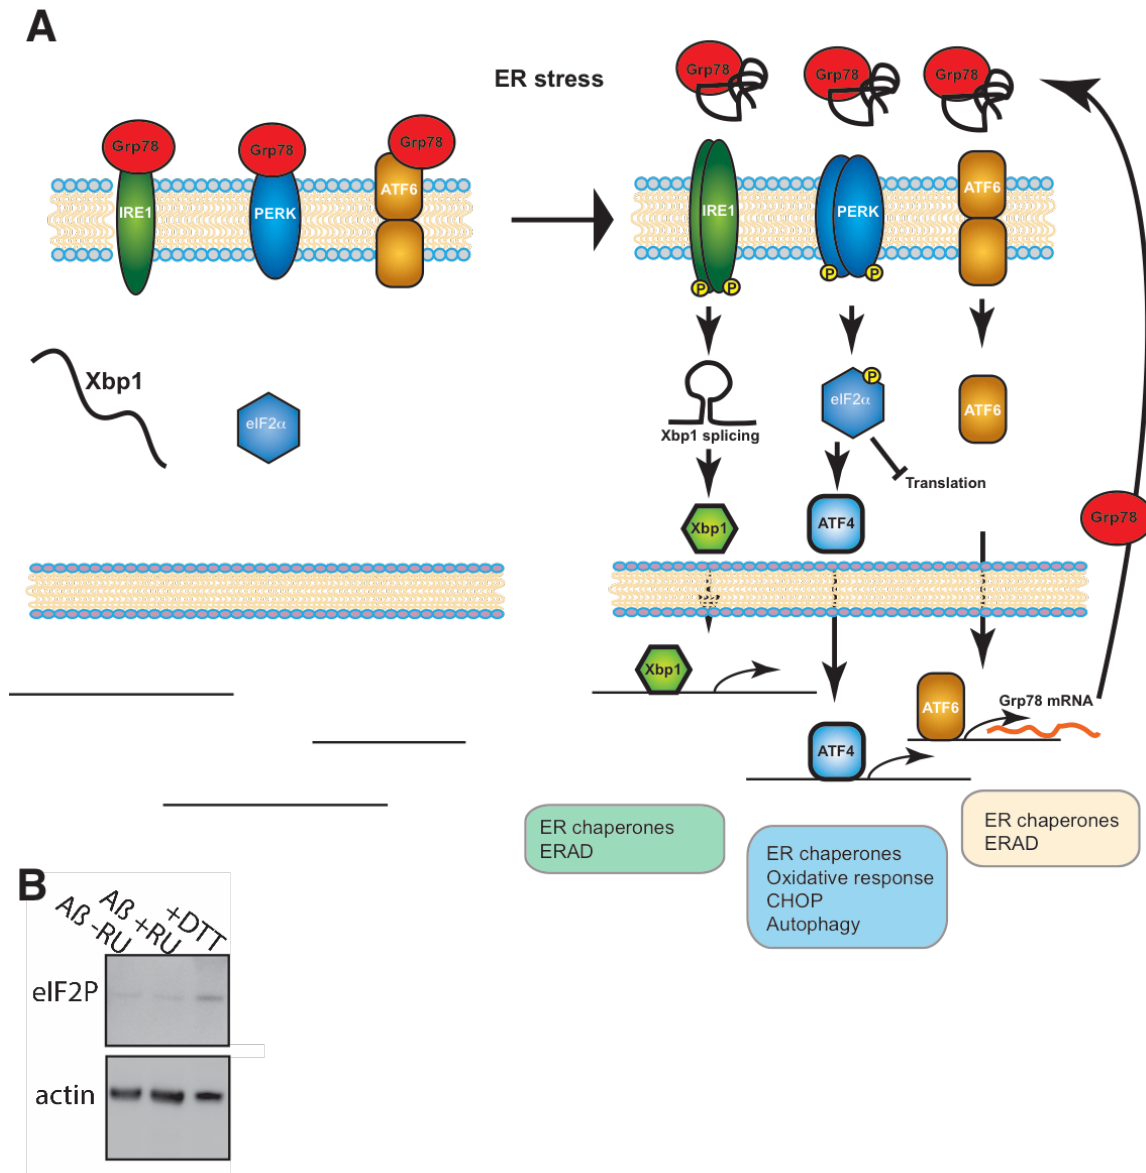

**Supplemental Figure 2, related to Fig 2. A. Schematic representation of the UPR.** The UPR is mediated by 3 trans-membrane signalling components: inositol-requiring enzyme 1 (IRE1), activating transcription factor 6 (ATF6) and protein kinase RNA-like ER kinase (PERK). Under normal physiological conditions, these are bound and inhibited by Grp78/BiP. During ER stress mis-folded proteins titrate away Grp78 thus activating the signalling cascades downstream of IRE1, ATF6 and PERK. This leads to phosphorylation of eIF2 $\alpha$  by PERK and global attenuation of protein translation and induction of a set of downstream transcription factors which lead to the production of proteins involved in re-instating ER proteostasis. IRE1 induces Xbp1 splicing, leading to the translation of an active Xbp1 transcription factor, ATF6 is cleaved in the Golgi to give a cytosolic ATF6 fragment, which also enters the nucleus to induce transcription, and PERK induces the expression of ATF4. All these induce the expression of chaperones, factors involved in ERAD (ER-associated protein degradation), autophagy, redox and, eventually, apoptosis. **B.** Western blot of head samples from flies expressing A $\beta$  (+RU) and their uninduced controls (-RU) as well as heads treated with 5mM DTT in Schneider's medium for 4 hours, to induce the UPR. Genotypes: *UAS A $\beta$ ; elavGS*.

## Supplemental Experimental Procedures

### Generation of new transgenic lines

The Glut1 open reading frame from clone LD20062 (DSHB, Iowa) was digested with EcoR1 and Xho1 restriction enzymes and cloned into pUAST. The pUAST-Glut1 construct was used to generate germline transgenics in the w1118 background (Fly Facility, Department of Genetics, University of Cambridge). A number of transgenics were generated and one line carrying UAS-Glut1 (line1) on the second chromosome was used for this study. Another line UAS-Glut1 (line8) was used to confirm the initial phenotype (data not shown).

The GFAT2 open reading frame was amplified from genomic DNA using primers CTACTCCACGGTCACCGACTTG+ CACCATGTGTGGCATATTCGCGT and topo cloned into pENTR/ TOPO entry vector (Invitrogen K2400-20) following the manufacturer's protocol and from this transferred to vector pUASTattB with an LR clonase (Invitrogen 11791-043) according to the manufacturer's protocols. To generate transgenic flies, the vector was integrated into the attP40 landing site using  $\phi$ C31 and attP/attB targeted integration system.

The QUAS-A $\beta$ 42 Arctic flies were generated by amplifying the A $\beta$ 42 Arctic sequence from plasmid pMT A $\beta$ Arc (a generous gift from Damian Crowther) with primers CACCATGGCGAGCAAAGTCTC and TTACGCAATCACCACGCCGC and cloned into vector pQUAS. pQUAS-A $\beta$ 42 Arctic was used to generate germline transgenics in the w1118 background (Fly Facility, Department of Genetics, University of Cambridge). A number of transgenics were generated and one line carrying QUAS-A $\beta$ 42 Arc (QUAS-AB) on the second chromosome was used for this study (line D).

### Glucose uptake assay

Glucose uptake was carried out based on [S1]. Briefly, imaginal discs were dissected from L3 larvae and incubated in PBS with 2.5mg/ml 2-NBDG (Molecular Probes N13195) for 20 minutes, then washed twice in ice cold PBS, mounted in Vectashield containing DAPI and imaged immediately on a Zeiss LSM510 inverted confocal microscope.

### ADP/ATP

20 fly heads were homogenised in 30 $\mu$ l of TCA with glass beads in a ribolyser. Samples were spun at 11,500g for 15 minutes at 4°C. Supernatants were neutralised by diluting 1:10 in 1M Tris HCl pH 8. 50 $\mu$ l of sample was used to measure ADP and ATP with Abcam's ADP/ATP Ratio Assay Kit (ab65313), according to the manufacturer's protocol. Samples were loaded in duplicate, and 4 biological repeats were used for each genotype. Values are expressed as the mean of those replicates +/-SEM, samples were compared with ANOVA.

### Quantitative PCR

Total RNA was extracted from 20-25 fly heads per sample using TRIzol® (GIBCO) according to the manufacturer's instructions. The concentration of total RNA purified for each sample was measured using an Eppendorf biophotometer. One microgram of total RNA was then subjected to DNA digestion using DNase I (Ambion), immediately followed by reverse transcription using the SuperScript® II system (Invitrogen) with oligo(dT) primers. Quantitative PCR was performed using the PRISM 7000 sequence-detection system (Applied Biosystems), SYBR® Green (Molecular Probes), ROX Reference Dye (Invitrogen), and HotStarTaq (Qiagen) by following the manufacturer's instructions. Each sample was analysed in duplicate and values are the mean of three-four independent biological repeats +/- SEM. Primers used were:

Glut1 TTACCGCGGAGCTCTTCTCC +GCCATCCAGTTGACCAGCAC

A $\beta$ 42 CGATCCTTCTCTGCTAACC+ CACCATCAAGCCAATAATCG

Grp78 TCTTGACACACCAACGCAGG+ CAAGGAGCTGGGCACAGTGA

eIF1A ATCAGCTCCGAGGATGACGC + GCCGAGACAGACGTTCCAGA

Spliced Xbp1 CCGAACTGAAGCAGCAACAGC + GTATACCCTGCGGCAGATCC [S2]

## Supplemental References

- S1. Zou, C., Wang, Y., and Shen, Z. (2005). 2-NBDG as a fluorescent indicator for direct glucose uptake measurement. *Journal of biochemical and biophysical methods* 64, 207-215.
- S2. Maor, G., Rencus-Lazar, S., Filocamo, M., Steller, H., Segal, D., and Horowitz, M. (2013). Unfolded protein response in Gaucher disease: from human to *Drosophila*. *Orphanet J Rare Dis* 8, 140.
